# Supplementary material
Source: PubMed Central journal article supplement (PMC3959167)
Supplement: NIHMS547858-supplement-1.pdf [file NIHMS547858-supplement-1.pdf]

# HIV-1 persistence in CD4<sup>+</sup> T cells with stem cell-like properties

## Supplementary Material

Maria J. Buzon<sup>1,2</sup>, Hong Sun<sup>2,3</sup>, Chun Li<sup>2</sup>, Amy Shaw<sup>2</sup>, Katherine Seiss<sup>2</sup>, Zhengyu Ouyang<sup>2</sup>, Enrique Martin-Gayo<sup>2</sup>, Jin Leng<sup>2</sup>, Timothy J. Henrich<sup>4</sup>, Jonathan Z. Li<sup>4</sup>,  
Florescia Pereyra<sup>2,4</sup>, Ryan Zurakowski<sup>5</sup>, Bruce D. Walker<sup>2,6</sup>,  
Eric S. Rosenberg<sup>1</sup>, Xu G. Yu<sup>2</sup>, Mathias Lichterfeld<sup>1</sup>

<sup>1</sup>Infectious Disease Division, Massachusetts General Hospital, Boston, MA

<sup>2</sup>Ragon Institute of MGH, MIT and Harvard, Cambridge, MA

<sup>3</sup>AIDS Research Center, The First Affiliated Hospital of China Medical University, Shenyang, Liaoning Province, P. R. China

<sup>4</sup>Infectious Disease Division, Brigham and Women's Hospital, Boston, MA

<sup>5</sup>Department of Electrical and Computer Engineering, University of Delaware, Newark, DE

<sup>6</sup>Howard Hughes Medical Institute, Chevy Chase, MD

Corresponding author:  
Mathias Lichterfeld, M. D., Ph. D.  
Assistant Professor of Medicine  
Infectious Disease Division  
Massachusetts General Hospital  
55 Fruit Street, Jackson 5  
Boston, MA 02114, USA
