# Supplementary material
Source: PubMed Central journal article supplement (PMC3959167)
Supplement: NIHMS547858-supplement-2.pdf [file NIHMS547858-supplement-2.pdf]

## Supplementary Figure 1

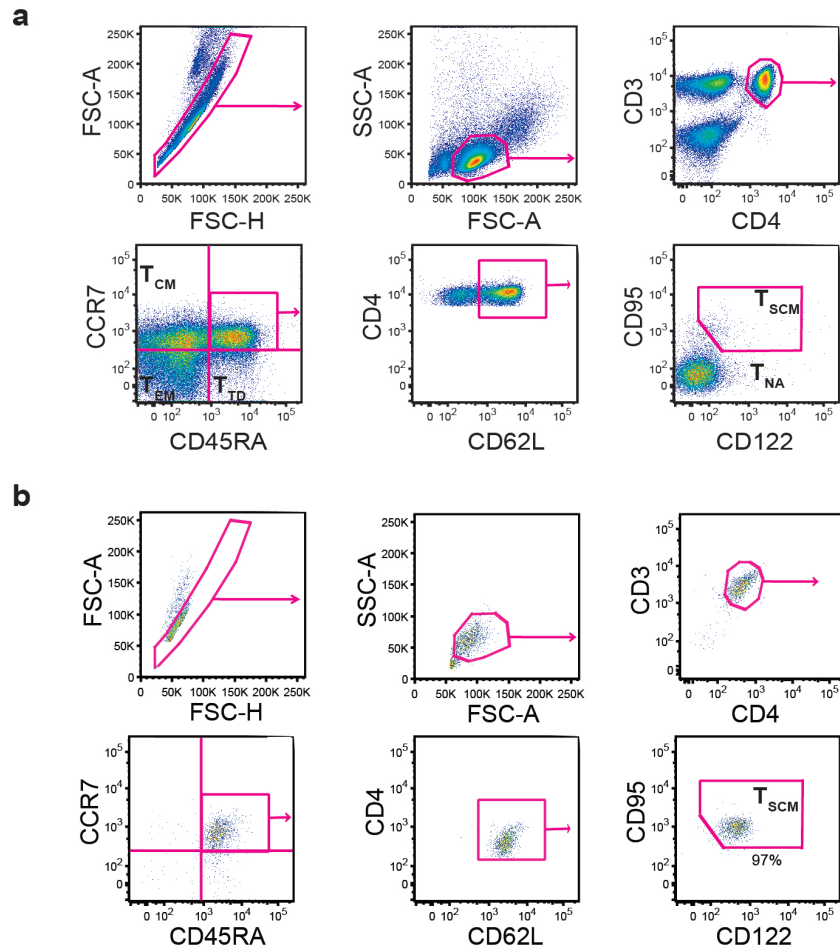

**Supplementary Figure 1: Flow cytometric gating and sorting strategy for CD4<sup>+</sup> T<sub>SCM</sub> cells.** (a): Dot plots demonstrating the sequential gating process used for identification and isolation of CD4<sup>+</sup> T<sub>SCM</sub> cells. (b) Assessment of the purity of sorted CD4<sup>+</sup> T<sub>SCM</sub> cells by flow cytometric re-analysis of sorted CD4<sup>+</sup> T<sub>SCM</sub> cells.
