# Supplementary material
Source: PubMed Central journal article supplement (PMC3959167)
Supplement: NIHMS547858-supplement-3.pdf [file NIHMS547858-supplement-3.pdf]

## Supplementary Figure 2

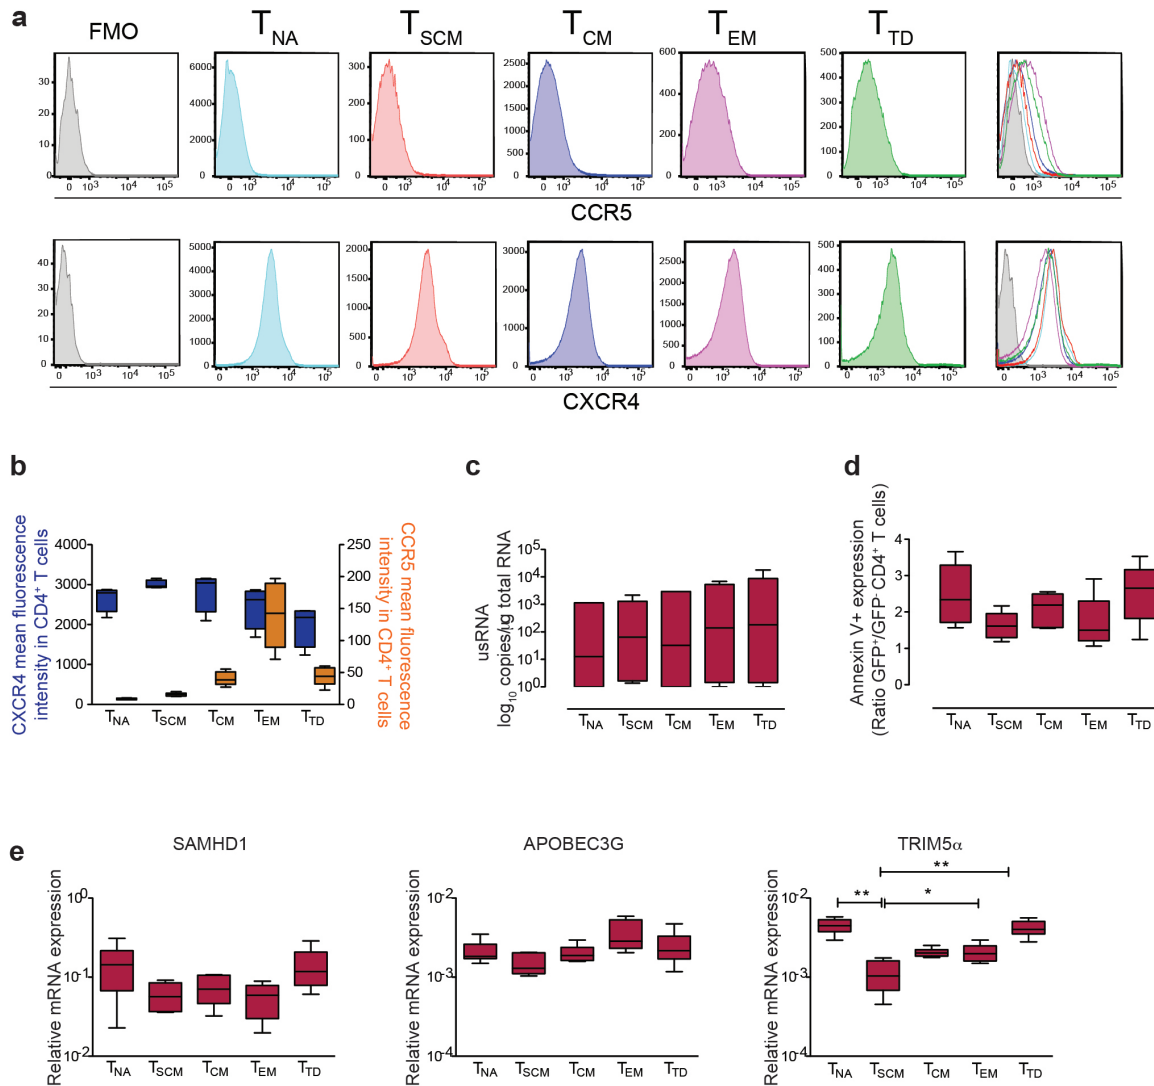

**Supplementary Figure 2:  $CD4^+$   $T_{SCM}$  cells are susceptible to HIV-1.** (a) Representative dot plots indicating CCR5 and CXCR4 surface expression on indicated  $CD4^+$  T cell subsets. (b): Surface expression of CCR5 and CXCR4 on indicated  $CD4^+$  T cell subsets. Data from n=4 study subjects are included. (c): Analysis of cell-associated HIV-1 RNA in sorted  $CD4^+$  T cell subsets from seven untreated HIV-1 infected persons with progressive disease. (d): Analysis of Annexin V expression in  $CD4^+$  T cell subsets after infection with HIV-1. Data reflect the ratio of the mean fluorescence intensity of Annexin V on GFP-positive vs GFP-negative  $CD4^+$  T cells in indicated T cell populations after infection with GFP-encoding, R5-tropic HIV-1. Data from 8 study

subjects are shown. (e): Expression of HIV-1 restriction factors in CD4<sup>+</sup> T cell subsets. Data demonstrate the mRNA expression of SAMHD1, APOBEC3G and TRIM5 $\alpha$  in indicated CD4<sup>+</sup> T cell subsets from 6 different study patients. (b-e): Significance was tested using Wilcoxon rank sum tests followed by Bonferroni correction for multiple comparisons (\*, \*\* reflect  $p < 0.05$ ,  $p < 0.01$ , respectively).
