# Supplementary material
Source: PubMed Central journal article supplement (PMC3959167)
Supplement: NIHMS547858-supplement-4.pdf [file NIHMS547858-supplement-4.pdf]

### Supplementary Figure 3

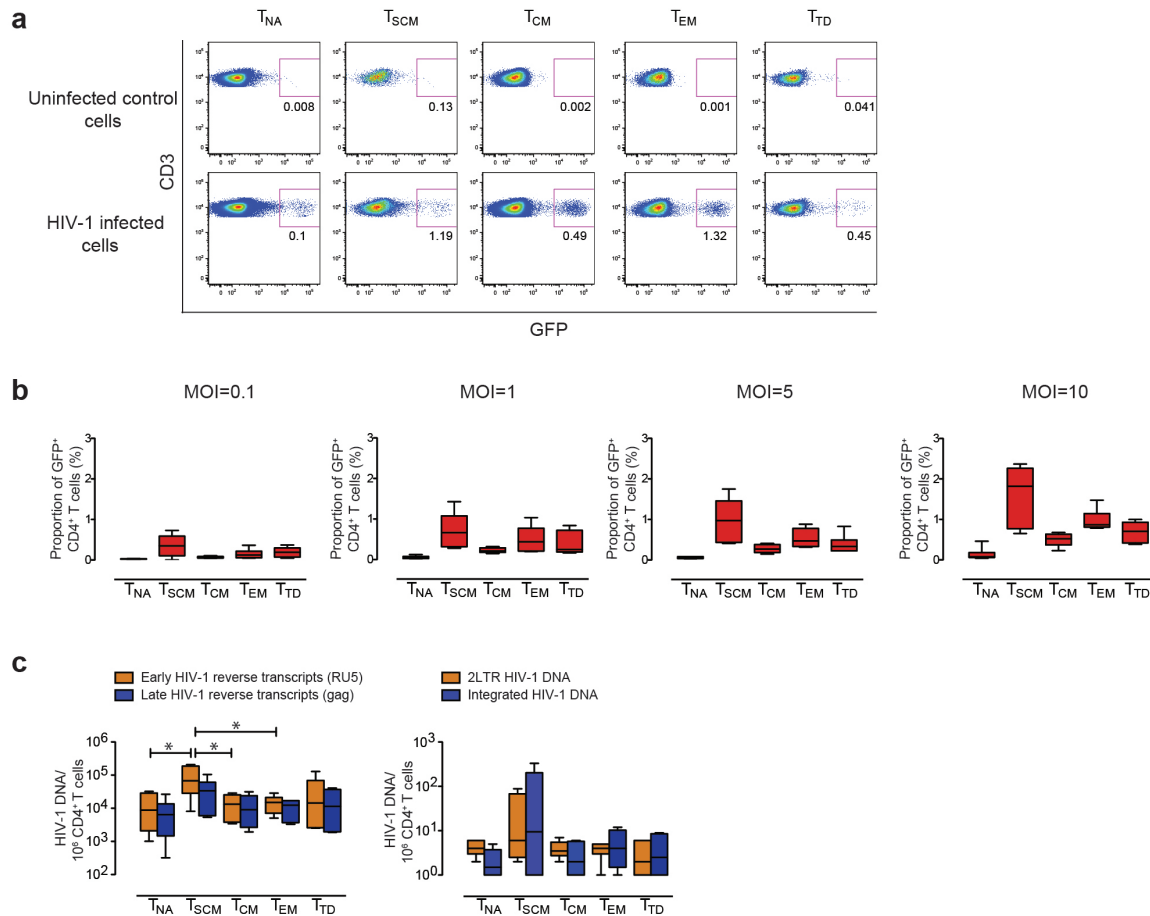

**Supplementary Figure 3: Susceptibility of CD4<sup>+</sup> T<sub>SCM</sub> cells to ex-vivo infection with HIV-1.** (a): Representative flow cytometry panels reflecting the proportion of HIV-1 infected cells in indicated CD4<sup>+</sup> T cell subsets after infection with GFP-encoding, R5-tropic HIV-1. (b): Proportion of GFP<sup>+</sup> cells within indicated CD4<sup>+</sup> T cell populations after ex-vivo infection of unstimulated PBMC with GFP-encoding VSV-G-pseudotyped HIV-1 at the indicated MOI. Experimental results from n=6 study subjects are shown. (c): Quantitative analysis of early/late reverse HIV-1 transcripts, chromosomally integrated HIV-1 DNA and 2-LTR HIV-1 DNA in indicated CD4<sup>+</sup> T cell subsets after infection with a VSV-G pseudotyped HIV-1 virus. Data from n=8 study subjects are shown. (b-c): Significance was tested using Wilcoxon rank sum tests followed by Bonferroni correction for multiple comparisons (\*reflects p<0.05).
