# Supplementary material
Source: PubMed Central journal article supplement (PMC3959167)
Supplement: NIHMS547858-supplement-5.pdf [file NIHMS547858-supplement-5.pdf]

**Supplementary Figure 4**

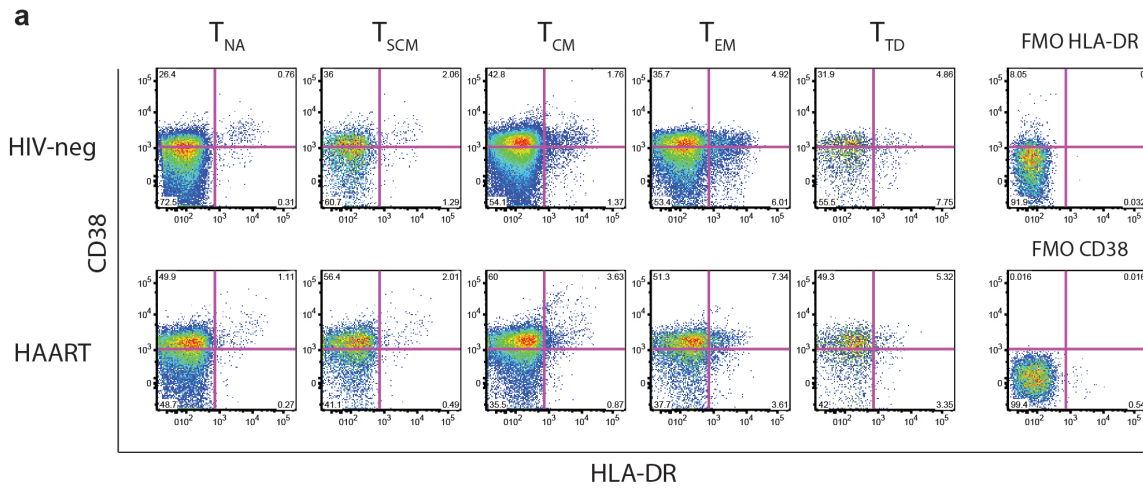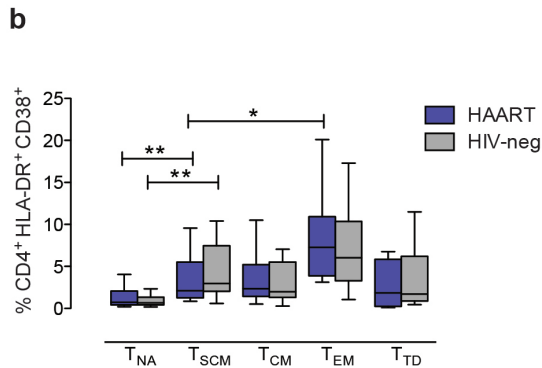

**Supplementary Figure 4: Expression of T cell activation markers on CD4<sup>+</sup> T<sub>SCM</sub> cells.** (a): Representative flow cytometry dot plots reflecting expression of HLA-DR and CD38 on indicated CD4<sup>+</sup> T cell subsets. Quadrant cut-offs were set according to fluorescence-minus-one (FMO) controls. (b): Proportions of cells co-expressing HLA-DR and CD38 in each of the indicated CD4<sup>+</sup> T cell subsets. Cumulative data from n=10 study subjects are shown. Significance was tested using Wilcoxon rank sum tests followed by Bonferroni correction for multiple comparisons (\*, \*\* reflect p<0.05, p<0.01 respectively).
