# Supplementary material
Source: PubMed Central journal article supplement (PMC3959167)
Supplement: NIHMS547858-supplement-6.pdf [file NIHMS547858-supplement-6.pdf]

## Supplementary Figure 5

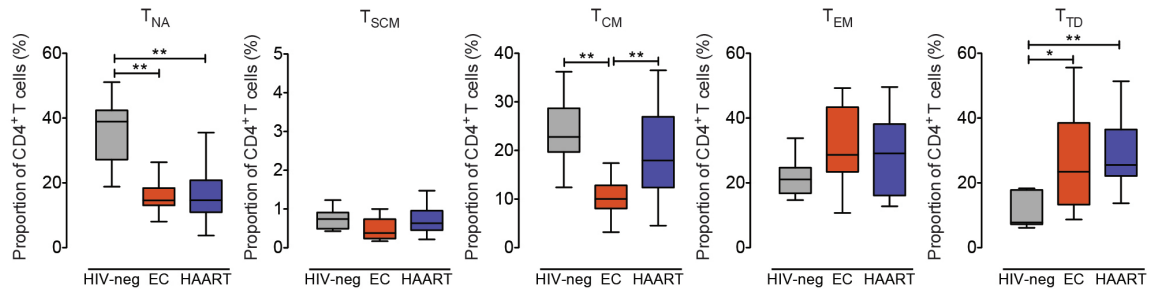

**Supplementary Figure 5: Proportions of CD4<sup>+</sup> T<sub>SCM</sub> cells in HAART-treated patients, elite controllers and HIV-1 negative persons.** Proportions of different CD4<sup>+</sup> T cell subsets in HIV-1 negative persons (n=7), HAART-treated individuals (n=20) and HIV-1 elite controllers (n=18) are shown. HAART-treated patients and elite controllers had undetectable levels of HIV-1 replication for a median of 8 years. Significance was tested using Kruskal-Wallis test followed by post-hoc analysis with Dunn's multiple comparison test (\*, \*\* reflect p<0.05, p<0.01 respectively).
