# Supplementary material
Source: PubMed Central journal article supplement (PMC3959167)
Supplement: NIHMS547858-supplement-7.pdf [file NIHMS547858-supplement-7.pdf]

## Supplementary Figure 6

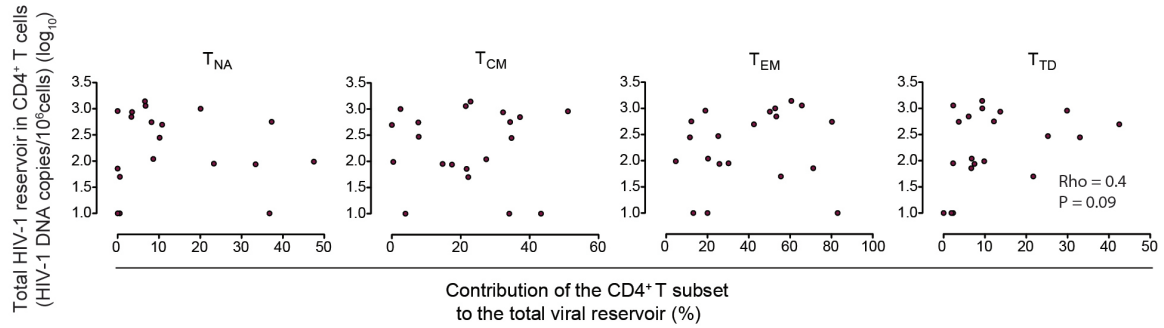

**Supplementary Figure 6: Spearman correlation between contributions of indicated CD4<sup>+</sup> T cell subsets to the total HIV-1 CD4<sup>+</sup> T cell reservoir and corresponding size of the HIV-1 reservoir in total CD4<sup>+</sup> T cells.**
