# Supplementary material
Source: PubMed Central journal article supplement (PMC3959167)
Supplement: NIHMS547858-supplement-8.pdf [file NIHMS547858-supplement-8.pdf]

**Supplementary Figure 7:**

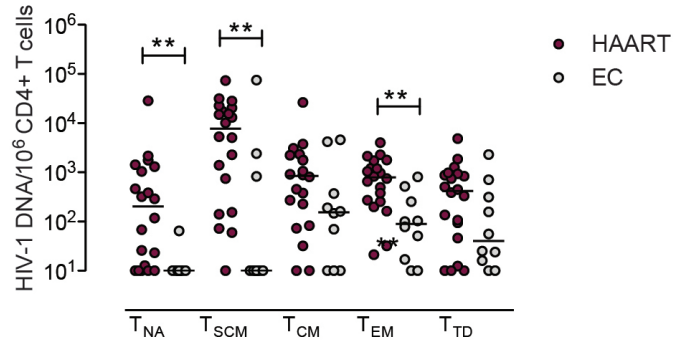

**Supplementary Figure 7: Comparison of cell-associated HIV-1 DNA in CD4<sup>+</sup> T cell subsets from HAART-treated patients and elite controllers.** Significance was tested using Mann Whitney U test (\*\*: p<0.01).
