# Supplementary material
Source: PubMed Central journal article supplement (PMC3959167)
Supplement: NIHMS547858-supplement-9.pdf [file NIHMS547858-supplement-9.pdf]

## Supplementary Figure 8

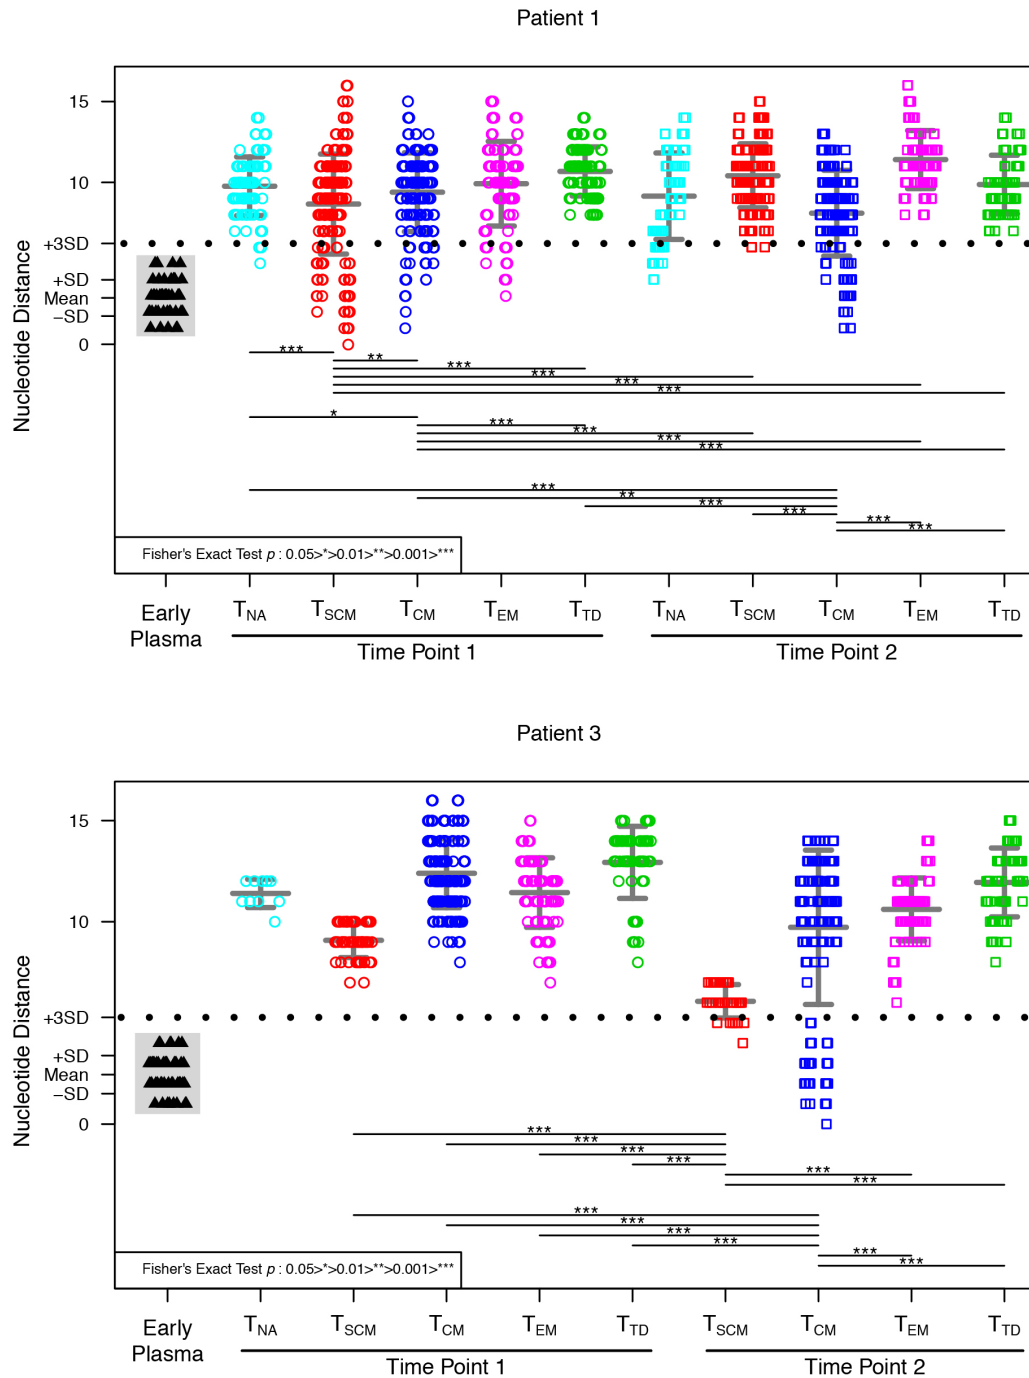

**Supplementary Figure 8: HIV-1 DNA sequences in CD4<sup>+</sup> T<sub>SCM</sub> and T<sub>CM</sub> cells from later stages of HIV-1 disease have the lowest genetic distance to early HIV-1 plasma RNA sequences.** Data indicate the genetic distance between early HIV-1 plasma RNA

sequences and HIV-1 DNA sequences from different CD4<sup>+</sup> T cell subsets collected during the subsequent disease process, as determined by pair-wise comparisons of all available individual sequences from each sample, using the dist.DNA function in R (ape). Pair-wise comparisons among early HIV-1 plasma RNA sequences, indicated by a shaded box, were calculated as a reference; horizontal dotted line reflects an arbitrary cut-off of three standard deviations of the mean genetic distance among early plasma HIV-1 RNA sequences. Fisher's exact tests was used to compare the frequency of viral sequences with a genetic distance <3 standard deviations to the reference between two given CD4<sup>+</sup> T cell subpopulations.
