# Supplementary material
Source: PubMed Central journal article supplement (PMC3959167)
Supplement: NIHMS547858-supplement-10.pdf [file NIHMS547858-supplement-10.pdf]

## Supplementary Figure 9

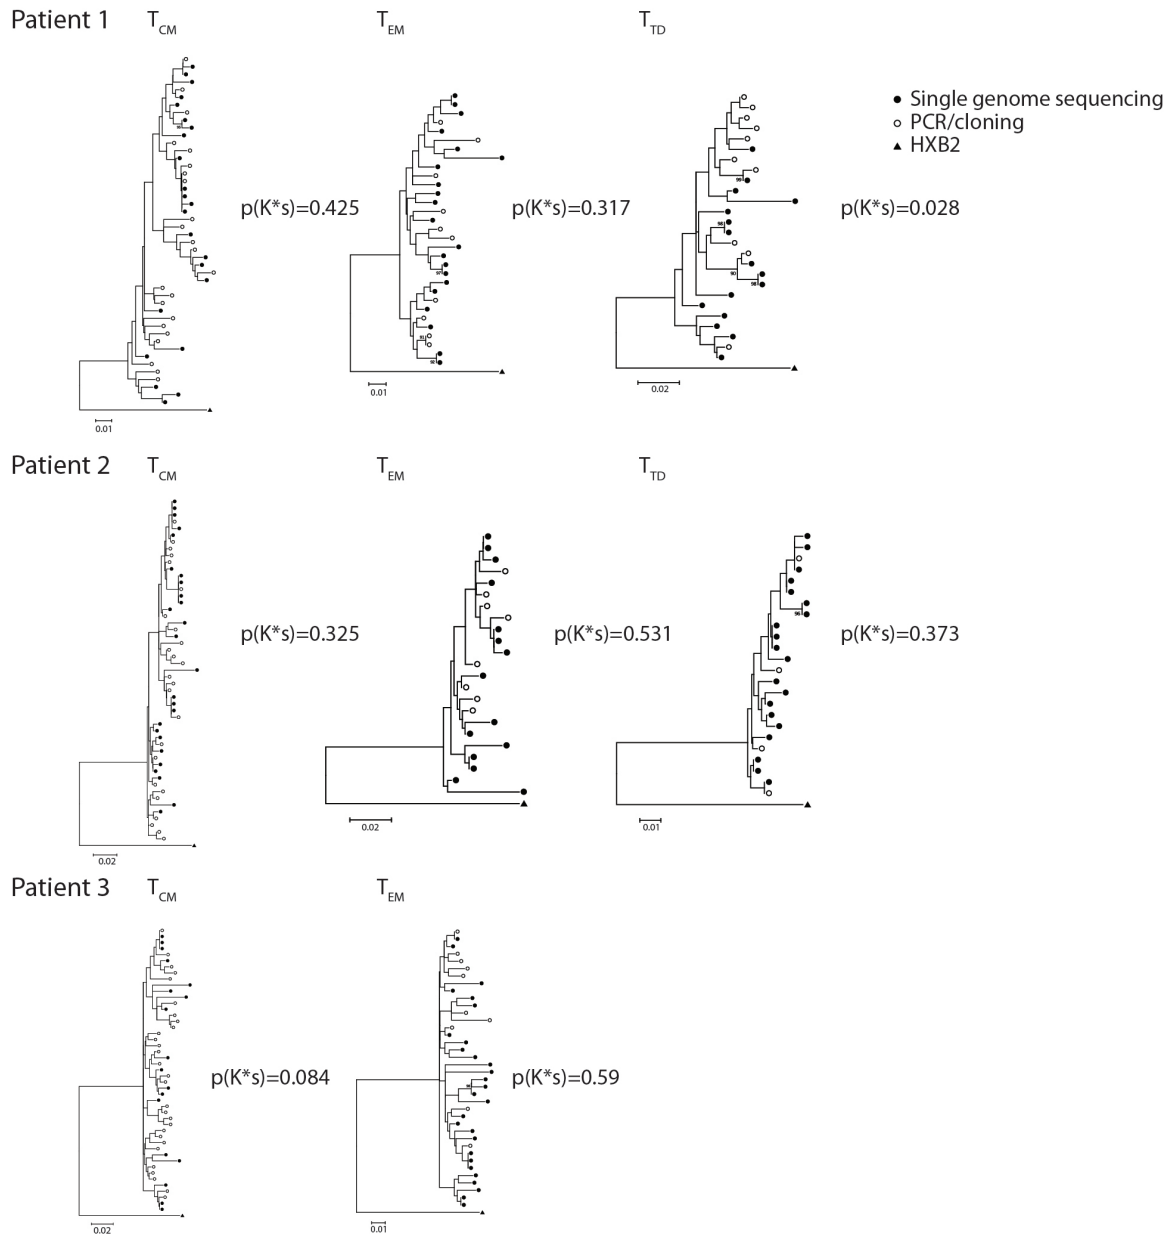

**Supplementary Figure 9: Comparison of HIV-1 sequences obtained by single-genome analysis vs PCR/cloning analysis.** HIV-1 sequences were generated and analyzed by single-genome analysis as described in<sup>25</sup> from indicated CD4<sup>+</sup> T cell populations. Phylogenetically-informative HIV-1 sequences generated by PCR/cloning were compared to sequences obtained by single-genome analysis from the same cell

populations, using neighborhood-joining phylogenetic trees. Solid symbols represent sequences derived by single genome sequencing and open squares represent sequences derived by PCR/cloning. Tests for panmixia ( $p(K*s)$ ) were calculated as described before (<http://www.abi.snv.jussieu.fr/achaz/hudsonstest.html>)<sup>24</sup> and are indicated for each comparison; this algorithm assumes that if biases were introduced by the analysis type, the groups of sequences generated by single-genome analysis and PCR/cloning would be significantly different with a  $p(K*s)$  value of  $<0.003$ <sup>24</sup>.
