# Supplementary material
Source: PubMed Central journal article supplement (PMC3959167)
Supplement: NIHMS547858-supplement-11.pdf [file NIHMS547858-supplement-11.pdf]

## Supplementary Table

| Patient number | Plasma HIV RNA (copies/ml) | CD4 <sup>+</sup> cell count (cells/mm <sup>3</sup> ) | CD8 <sup>+</sup> cell count (cells/mm <sup>3</sup> ) | Treatment               | Duration of HIV-1 infection (months) |
|----------------|----------------------------|------------------------------------------------------|------------------------------------------------------|-------------------------|--------------------------------------|
| 1              | 29,400                     | 637                                                  | 1116                                                 | Naive                   | 16                                   |
| 2              | 44500                      | 2                                                    | 183                                                  | Naive                   | 204                                  |
| 3              | 169000                     | 369                                                  | 796                                                  | Naive                   | 27                                   |
| 4              | 63500                      | 272                                                  | 2183                                                 | Naive                   | 240                                  |
| 5              | 16200                      | 530                                                  | 610                                                  | Naive                   | 24                                   |
| 6              | 14600                      | 1049                                                 | 1701                                                 | Naive                   | 4                                    |
| 7              | 81100                      | 159                                                  | 874                                                  | Naive                   | 38                                   |
| 8              | <400                       | 825                                                  | 815                                                  | Naïve (EC)              | 266                                  |
| 9              | <400                       | 1583                                                 | 514                                                  | Naïve (EC)              | 274                                  |
| 10             | <400                       | 1112                                                 | NA                                                   | Naïve (EC)              | 144                                  |
| 11             | <400                       | 904                                                  | 765                                                  | Naïve (EC)              | 276                                  |
| 12             | <400                       | 785                                                  | 1745                                                 | Naïve (EC)              | 312                                  |
| 13             | <400                       | 784                                                  | 592                                                  | Naïve (EC)              | 246                                  |
| 14             | <400                       | 1043                                                 | 429                                                  | Naïve (EC)              | 240                                  |
| 15             | <400                       | 463                                                  | 365                                                  | Naïve (EC)              | 275                                  |
| 16             | <400                       | 1035                                                 | 559                                                  | Naïve (EC)              | 282                                  |
| 17             | <400                       | 1351                                                 | 988                                                  | Naïve (EC)              | 234                                  |
| 18             | <50                        | 837                                                  | 817                                                  | FTC, TDF, EFV           | 216                                  |
| 19             | <50                        | 1116                                                 | 733                                                  | FTC, TDF, EFV           | 219                                  |
| 20             | <50                        | 1337                                                 | 934                                                  | AZT, 3TC, TDF, EFV      | 180                                  |
| 21             | <50                        | 1059                                                 | 568                                                  | FTC, TDF, EFV           | 180                                  |
| 22             | <50                        | 455                                                  | 325                                                  | 3TC, ABC, ATZ/r         | 168                                  |
| 23             | <50                        | 445                                                  | 1000                                                 | ABC, 3TC, NVP, ATZ/r    | 192                                  |
| 24             | <50                        | 468                                                  | 694                                                  | ABC, 3TC, EFV           | 144                                  |
| 25             | <50                        | 974                                                  | 1126                                                 | FTC, TDF, ATZ/r         | 252                                  |
| 26             | <50                        | 532                                                  | 536                                                  | FTC, TDF, EFV           | 60                                   |
| 27             | <50                        | 910                                                  | 649                                                  | 3TC, AZT, EFV           | 91                                   |
| 28             | <50                        | 878                                                  | 853                                                  | FTC, TDF, EFV           | 77                                   |
| 29             | <50                        | 671                                                  | 468                                                  | 3TC, AZT, ABC, NFV      | 132                                  |
| 30             | <50                        | 711                                                  | 662                                                  | 3TC, AZT, EFV           | 101                                  |
| 31             | <50                        | 617                                                  | 626                                                  | 3TC, AZT, EFV           | 137                                  |
| 32             | <50                        | 879                                                  | 788                                                  | FTC, TDF, LPV/r         | 55                                   |
| 33             | <50                        | 724                                                  | 1010                                                 | FTC, TDF, NVP           | 110                                  |
| 34             | <50                        | 1021                                                 | 784                                                  | FTC, TDF, LPV/r         | 88                                   |
| 35             | <50                        | 1112                                                 | 920                                                  | FTC, TDF, EFV           | 94                                   |
| 36             | <50                        | 619                                                  | 423                                                  | FTC, TDF, EFV           | 117                                  |
| 37             | <50                        | 1850                                                 | 555                                                  | FTC, TDF, LPV/r         | 67                                   |
| 38             | <50                        | 548                                                  | 1083                                                 | LPV/r, TDF, FTC         | 252                                  |
| 39             | <50                        | 627                                                  | 1704                                                 | LPV/r, TDF, FTC         | 255                                  |
| 40             | <50                        | 605                                                  | 2009                                                 | 3TC, AZT, TDF, EFV, RAL | 228                                  |

**Supplementary Table: Clinical characteristics of Study patients.** Patients 1-7 were included in Supplementary Figure 2b; Patients 18-37 were included in Figure 1b,c and Supplementary Figure 6; Patients 38-40 were included in Figure 1d, Patients 8-37 were

included in Supplementary Figure 7. Patients 27-30, 33, 35-37 were included in Figure 1e, f and g.
